# Supplementary material
Source: MDPI journal article supplement (https://www.mdpi.com/2304-6732/10/8/942)
Supplement: s1 [file s1]

# SUPPLEMENTARY FILE (S1)

**Table 1.** FTIR peaks and the assignments of the samples PVDF—polyvinylidene fluoride, HC—hydroxyethyl cellulose, LG—Lignin, and CS—camphor soot, PHC—(HC – PVDF) composite, PCS— (CS PVDF) composite, and PLG— (LG–PVDF) composite.

| <b>Wave</b>              |                                                                   |                    |                   |
|--------------------------|-------------------------------------------------------------------|--------------------|-------------------|
| <b>Number</b>            | <b>Peak assignments</b>                                           | <b>Sample code</b> | <b>References</b> |
| <b>(cm<sup>-1</sup>)</b> |                                                                   |                    |                   |
| 599                      | CF <sub>2</sub> bending, $\alpha$ phase                           | PVDF               | 31                |
| 657                      | O=C-N stretching mode of DMF                                      | PVDF, PHC          | 33                |
| 666-699                  | C-H deformation, polymer chain defects                            | CS, LG             | 31                |
| 736                      | $\nu$ (C=O) GO                                                    | CS, PCS            | 22,25             |
| 780                      | $\alpha$ phase                                                    | PLG                | 23                |
| 791                      | C <sub>60</sub> and C <sub>70</sub> coexist                       | CS                 | 22                |
| 809                      | backbone of CNTs - $\nu$ (C=C)                                    | CS                 | 22,25             |
| 831-834                  | electroactive $\beta$ phase (C-F stretching)                      | PVDF, PHC,<br>PCS  | 21,33             |
| 837-840                  | Ar-CH out-of-plane deformation and $\beta$ phase (C-F stretching) | LG, PLG            | 21,23,26,28       |
| 869                      | $\delta/\gamma$ (C-H)                                             | CS                 | 22,25             |

|           |                                                                                                   |           |       |
|-----------|---------------------------------------------------------------------------------------------------|-----------|-------|
| 873       | (C–C–C asymmetrical stretching vibration) combination of all three phases of PVDF, $\alpha$ phase | PVDF      | 23    |
| 874       | C–H out of plane bending, $\alpha$ phase of PVDF                                                  | PHC       | 23    |
| 875       | C–C–C asymmetrical stretching vibration                                                           | PCS       | 26    |
| 878       | C–H out of plane bending, $\beta$ -glucoside linkage                                              | HC        | 29    |
| 1017      | COH, CCH deformation vibration                                                                    | HC        | 29    |
| 1022      | COH, CCH deformation vibration                                                                    | PHC       | 29    |
| 1023-1027 | C–O(H) + C–O(Ar) stretching, phenolic OH + ether                                                  | PLG, LG   | 27    |
| 1030      | C–O stretching vibrations in the anhydroglucose units of hydroxyethyl cellulose                   | PHC       | 28    |
| 1053      | C–O stretching vibrations in the anhydroglucose units of hydroxyethyl cellulose                   | HC        | 26    |
| 1054      | $\nu$ (C–O) carboxyl or phenol groups                                                             | CS        | 22,25 |
| 1068      | CH <sub>3</sub> rocking mode, $\alpha$ phase                                                      | PVDF, PCS | 23,33 |
| 1096      | CH <sub>3</sub> rocking mode                                                                      | PHC       | 33    |
| 1125      | Ar–CH in-plane deformation                                                                        | PLG       | 28    |

|           |                                                                                             |                |          |
|-----------|---------------------------------------------------------------------------------------------|----------------|----------|
| 1127      | Ar-CH in-plane deformation                                                                  | LG             | 28       |
| 1165      | the combination of $\beta$ and $\gamma$ (C-C band)                                          | PCS            | 21,24,26 |
| 1166      | the combination of $\beta$ and $\gamma$ (C-C band)                                          | PVDF           | 21,24,26 |
| 1171      | the combination of $\beta$ and $\gamma$ (C-C band)                                          | PHC            | 21,24,26 |
| 1214      | C-O(H) + C-O(Ar) stretching, phenolic OH + ether                                            | LG, PLG        | 28       |
| 1229-1235 | $\gamma$ phase                                                                              | PCS, PVDF, PHC | 24       |
| 1259      | C-O stretching                                                                              | PLG, LG        | 28       |
| 1265      | $\nu$ (C-O)                                                                                 | CS             | 22,25    |
| 1351-1361 | O-H deformation vibrations                                                                  | HC, LG         | 28       |
| 1386      | O-H in-plane deformation/ Phenolic OH and $\alpha$ phase                                    | PLG            | 28,29    |
| 1389      | attributed to CH <sub>2</sub> wagging vibration (a combination of all three phases of PVDF) | PHC            | 32       |
| 1402-1408 | attributed to CH <sub>2</sub> wagging vibration, $\beta$ phase, C-H deformation             | PVDF, PCS, HC  | 23,26,29 |
| 1435      | $\delta_{as}/\gamma$ (C-H)                                                                  | CS             | 29       |
| 1449      | C-C stretching Aromatic skeleton                                                            | LG             | 28       |
| 1453      | HCH, OCH bending                                                                            | HC             | 31       |
| 1504      | aromatic skeleton C-C stretching                                                            | LG             | 28       |

|           |                                                                     |                            |          |
|-----------|---------------------------------------------------------------------|----------------------------|----------|
| 1553-1562 | Carbon skeletal vibrations of CNTs —<br>$\nu(\text{C}=\text{C})$    | PCS, CS                    | 22,25    |
| 1564      | symmetric vibration C=O groups in the<br>polymer                    | HC                         | 29       |
| 1583-1585 | Conjugated C=O stretching                                           | PLG, LG                    | 28       |
| 1648-1676 | C=O stretching mode                                                 | PLG, HC, PHC,<br>PVDF, PCS | 28,33    |
| 1900      | $\nu(\text{C}=\text{O})$ CNT-COOH                                   | CS                         | 25       |
| 2846-2849 | C-H symmetrical stretching                                          | PHC, PVDF                  | 29       |
| 2851      | CH stretching mode                                                  | PCS                        | 33       |
| 2869      | C-H symmetrical stretching                                          | HC                         | 32       |
| 2900      | CH <sub>3</sub> and CH <sub>2</sub> Alkyl chain                     | CS                         | 25,26,29 |
| 2917      | CH <sub>3</sub> + CH <sub>2</sub> symmetric stretching<br>vibration | PLG                        | 28       |
| 2923-2925 | CH <sub>3</sub> + CH <sub>2</sub> symmetric stretching vibration    | PVDF, LG, PCS,<br>PHC, PLG | 28       |
| 2931      | symmetric vibration of CH <sub>2</sub> groups                       | HC                         | 26       |
| 3026      | CH <sub>2</sub> asymmetric vibration                                | PVDF                       | 26,31    |
| 3299      | OH stretching                                                       | LG, PLG                    | 29       |
| 3349-3365 | CNTs, carboxylic, phenolic or hydroxyl<br>groups                    | CS, PCS                    | 22,25,29 |

|           |                                             |         |    |
|-----------|---------------------------------------------|---------|----|
| 3369-3397 | stretching vibrations of the hydroxyl group | HC, PHC | 26 |
|-----------|---------------------------------------------|---------|----|

---
